# Supplementary material
Source: PubMed Central journal article supplement (PMC4541108)
Supplement: DS_10.1177_0022034514544507.pdf [file DS_10.1177_0022034514544507.pdf]

O. Egbuniwe<sup>1,2†</sup>, S. Grover<sup>3†</sup> A.K. Duggal<sup>3</sup>,  
A. Mavroudis<sup>3</sup>, M. Yazdi<sup>2</sup>, T. Renton<sup>2</sup>,  
L. Di Silvio<sup>1</sup>, and A.D. Grant<sup>3\*</sup>

<sup>1</sup>Biomaterials, Tissue Engineering, and Imaging, King's College London, London, UK; <sup>2</sup>Department of Oral Surgery, Dental Institute, King's College London, London, UK; and <sup>3</sup>Wolfson Centre for Age-Related Diseases, King's College London, London, UK; <sup>†</sup>authors contributing equally to this work; <sup>\*</sup>corresponding author, andrew.2.grant@kcl.ac.uk

*J Dent Res* DOI: 10.1177/0022034514544507

## TRPA1 and TRPV4 Activation in Human Odontoblasts Stimulates ATP Release

### APPENDIX

**Appendix Table.** Sequences of Primers Used to Identify Transient Receptor Potential Channels and Other Odontoblast Proteins, With Predicted Product Sizes

| Primer | Forward and Reverse Sequences                                    | Product Length (bp) |
|--------|------------------------------------------------------------------|---------------------|
| ALP    | F: 5'-CCACGTCTTCACATT TGGTG-3'<br>R: 5'-AGACTGCGCCTGGTAGTTGT-3'  | 196                 |
| COL-1  | F: 5'-CCAAATCTGTCTCCCCAGA-3'<br>R: 5'-TCAAAAACGAAGGGGAGAT-3'     | 213                 |
| GAPDH  | F: 5'-ACCACAGTCCATGCCATCAC-3'<br>R: 5'-TCCACCACCCTGTTGCTGTA-3'   | 452                 |
| TRPA1  | F: 5'-TGGTGCACAAATAGACCCAGT-3'<br>R: 5'-TGGGCACCTTTAGAGAGTAGC-3' | 318                 |
| TRPM8  | F: 5'-GCACCCAGATCAACCAAAGT-3'<br>R: 5'-CTTGGGCAAAACACAATG-3'     | 681                 |
| TRPV1  | F: 5'-GCCTGGAGCTGTTCAAGTTC-3'<br>R: 5'-GCCTGAACTCTGCTTGACC-3'    | 452                 |
| TRPV4  | F: 5'-ACATGCGGGAGTTCATTAAC-3'<br>R: 5'-CACAGCCAGCATCTCGTGGGG-3'  | 512/692             |
